# Supplementary material
Source: PubMed Central journal article supplement (PMC2735903)
Supplement: JCI39366sd.pdf [file JCI39366sd.pdf]

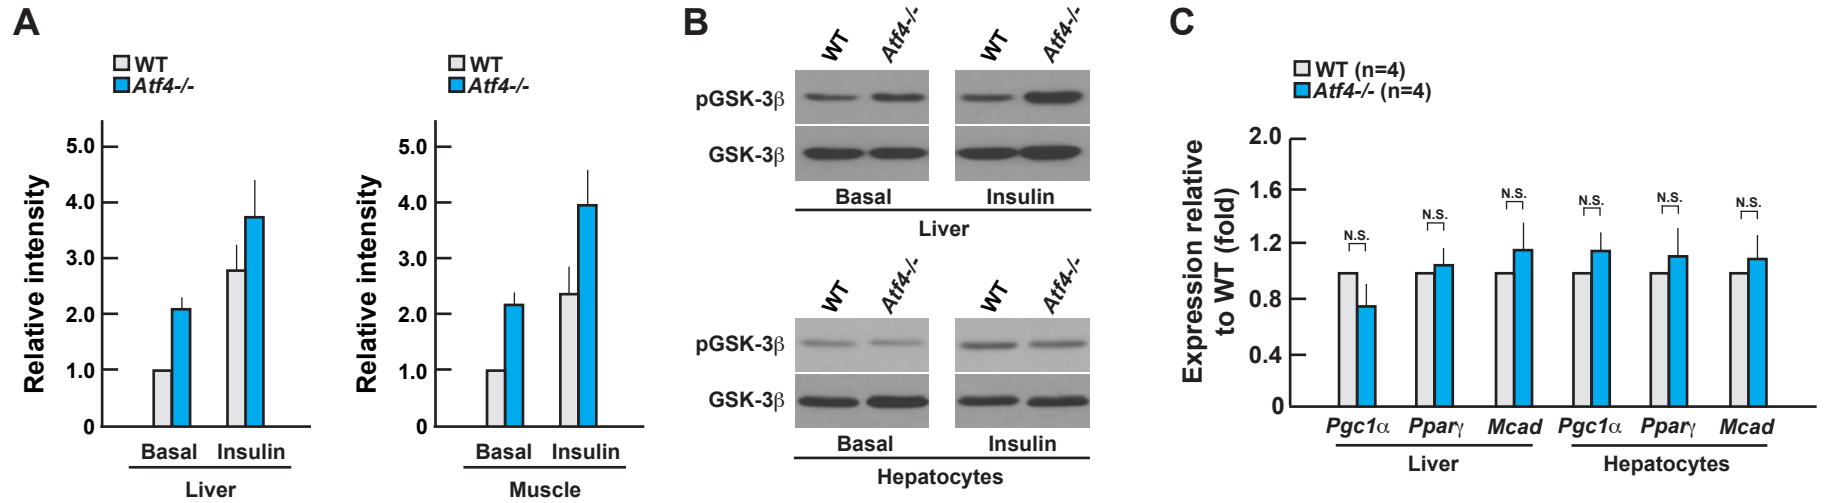

**Supplemental figure 1**

Comparison of insulin signaling pathway and gene expression in *Atf4*<sup>-/-</sup> liver and hepatocytes. **(A)** Quantification of Akt phosphorylation in *Atf4*<sup>-/-</sup> liver and muscle at basal and insulin stimulated condition. **(B)** Phosphorylation of GSK-3 $\beta$  in *Atf4*<sup>-/-</sup> liver (upper panel) or cultured hepatocytes at basal and insulin stimulated condition. **(C)** Expression of *Pgc1 $\alpha$* , *Ppar $\gamma$*  and *Mcad* in *Atf4*<sup>-/-</sup> liver or cultured hepatocytes. N.S.: not significant.

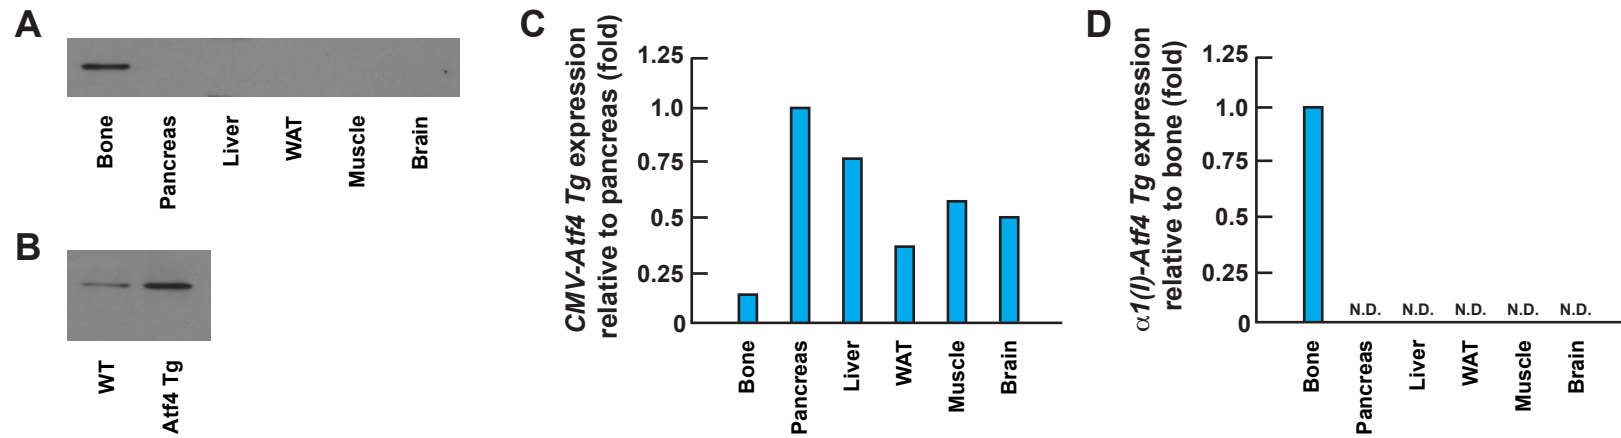

### Supplemental figure 2

Quantification of *Atf4* transgene. **(A)** *Atf4* protein expression in several tissues of  $\alpha 1(I)$ *Collagen-Atf4* transgenic mice. **(B)** *Atf4* protein expression in bone of WT and  $\alpha 1(I)$ *Collagen-Atf4* transgenic mice. **(C)** Expression of *CMV-Atf4* transgene in various tissues relative to pancreas in *CMV-Atf4* transgenic mice. **(D)** Expression of  $\alpha 1(I)$ *Collagen-Atf4* transgene in various tissues relative to bone in  $\alpha 1(I)$ *Collagen-Atf4* transgenic mice. N.D.: not detected.

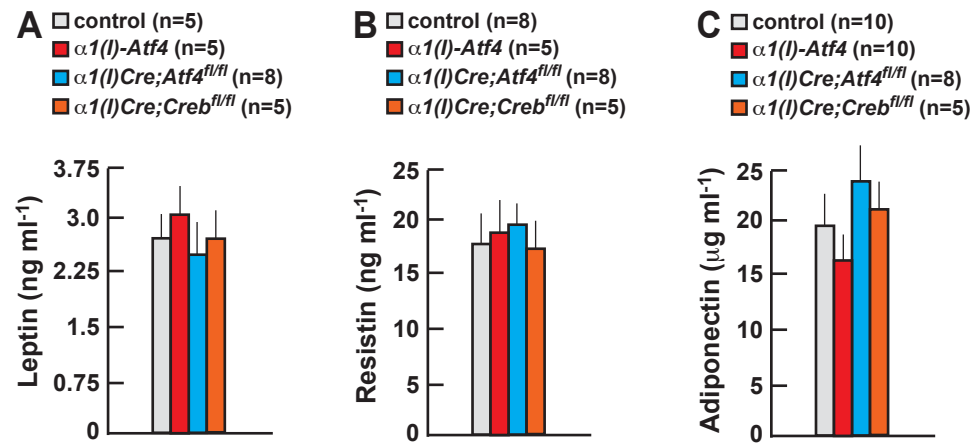

### Supplemental figure 3

Levels of Adipokines in mutant mice. Serum (A) leptin, (B) resistin and (C) adiponectin levels in  $\alpha 1(I)$ Collagen-Atf4,  $\alpha 1(I)$ Collagen-Cre;Atf4<sup>fl/fl</sup> and  $\alpha 1(I)$ Collagen-Cre;Creb<sup>fl/fl</sup> mice.

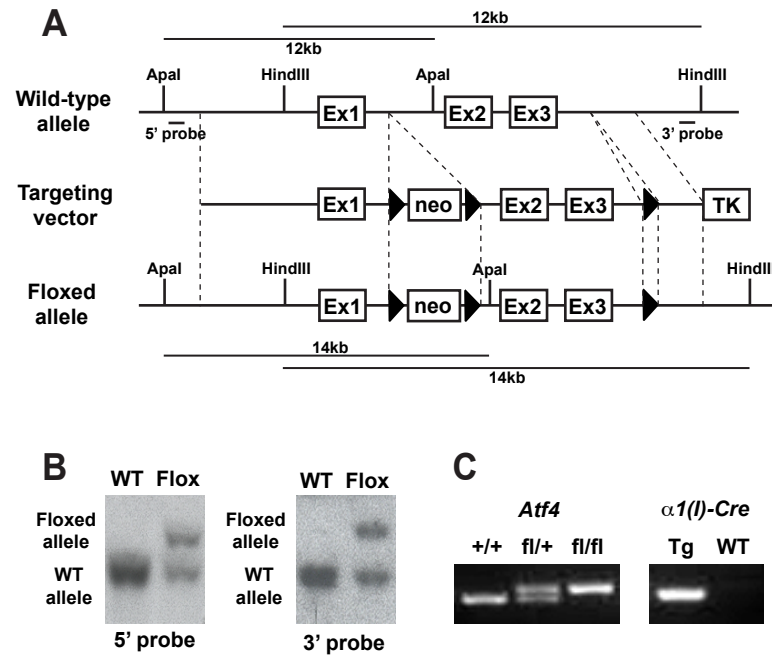

#### Supplemental figure 4

Generation of *Atf4<sup>osb</sup>* mice. **(A)** Targeting construct for conditional inactivation of *Atf4*. White box, exon; black triangles, LoxP sites. **(B)** Southern blot analysis of *Atf4-flox* clone. The 5' probe detected a 12 kb WT and 14 kb targeted band while 3' probe detected 12 kb WT and 14 kb targeted band. **(C)** PCR genotyping of *Atf4<sup>osb</sup>* mice. WT and floxed allele yield 600 bp and 640 bp products, respectively.  $\alpha 1(I)$ -collagen-Cre transgenic mice harbor a transgene-specific band.

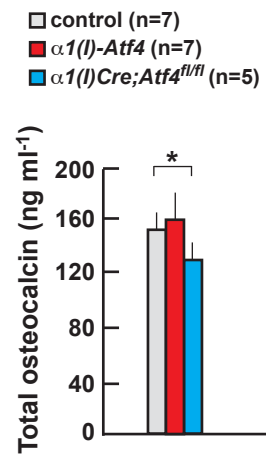

**Supplemental figure 5**

Level of osteocalcin in mutant mice. Serum total osteocalcin level in  $\alpha 1(I)\text{Collagen-Atf4}$  and  $\alpha 1(I)\text{Collagen-Cre;Atf4}^{fl/fl}$  mice.

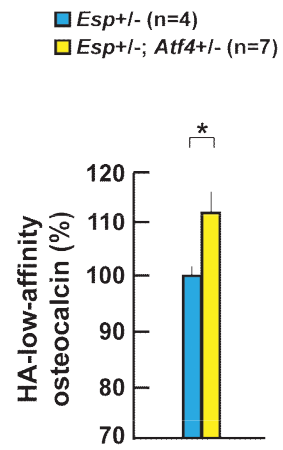

**Supplemental figure 6**

Serum uncarboxylated osteocalcin levels in *Esp*<sup>+/-</sup> and *Esp*<sup>+/-</sup>; *Atf4*<sup>+/-</sup> mice.

Error bars, mean + SEM. \*: P<0.05

Table S1 **Insulin sensitivity analysis of eight week-old *Atf4<sub>osb</sub>* <sup>-/-</sup> mice analyzed by hyperinsulinemic-euglycemic clamps.**

| <b>Genotype</b>                              | <b>Control (n=3)</b> | <b><i>Atf4<sub>osb</sub></i> <sup>-/-</sup> (n=3)</b> |
|----------------------------------------------|----------------------|-------------------------------------------------------|
| Body weight (g)                              | 25.0 ± 1.1           | 20.0 ± 0.3*                                           |
| Basal glucose (mg/dl)                        | 120.0 ± 12.7         | 94.7 ± 9.0                                            |
| Clamp glucose (mg/dl)                        | 101.7 ± 8.7          | 118.0 ± 14.0                                          |
| Glucose infusion rate (mg/kg/min)            | 47.2 ± 4.2           | 69.3 ± 2.5*                                           |
| Basal hepatic glucose production (mg/kg/min) | 10.4 ± 0.8           | 13.2 ± 0.9                                            |
| Clamp hepatic glucose production (mg/kg/min) | 2.4 ± 1.1            | 0.6 ± 1.6                                             |
| Liver action (%)                             | 77.5 ± 11.2          | 90.5 ± 9.0                                            |
| Glucose turnover (mg/kg/min)                 | 49.6 ± 4.2           | 69.9 ± 3.0*                                           |
| Whole body glycolysis (mg/kg/min)            | 32.9 ± 7.6           | 28.2 ± 1.6                                            |
| Glycogen synthesis (mg/kg/min)               | 16.7 ± 7.2           | 41.7 ± 4.3*                                           |

\*: P < 0.05
